# Supplementary material for: Sleep Quality and Other Predictors of Academic Performance in Rwandan Undergraduate Students
Source: Research Square preprint supplement (doi:10.21203/rs.3.rs-7474062/v1), 2025-09-03
Supplement: Supplementary file 1 [file 7318a9fc043a4e27327371d9.docx]

**Table 3: Cross tabulation between sleep quality and academic performance**

| **Sleep quality and academic performance crosstabulation** | | **Academic performance** | | Total |
| --- | --- | --- | --- | --- |
| **High**  **Number (%)** | **Low/Medium**  **Number (%)** |
| Sleep quality | Good sleep quality | 116 (92.1) | 10 (7.9) | 126 |
| Poor sleep quality | 49 (39.2) | 76 (60.8) | 125 |
| **Total** | | **165 (65.7)** | **86 (34.3)** | 251 |
| *Notes: Pearson Chi-Square = 77.854; p<0.001* | | | | |
